# Supplementary material for: Genome-Wide DNA Methylation Analysis of a Cohort of 41 Patients Affected by Oculo-Auriculo-Vertebral Spectrum (OAVS)
Source: MDPI journal article supplement (doi:10.3390/ijms22031190), 2021-01-26

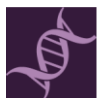

Supplementary Figure S1

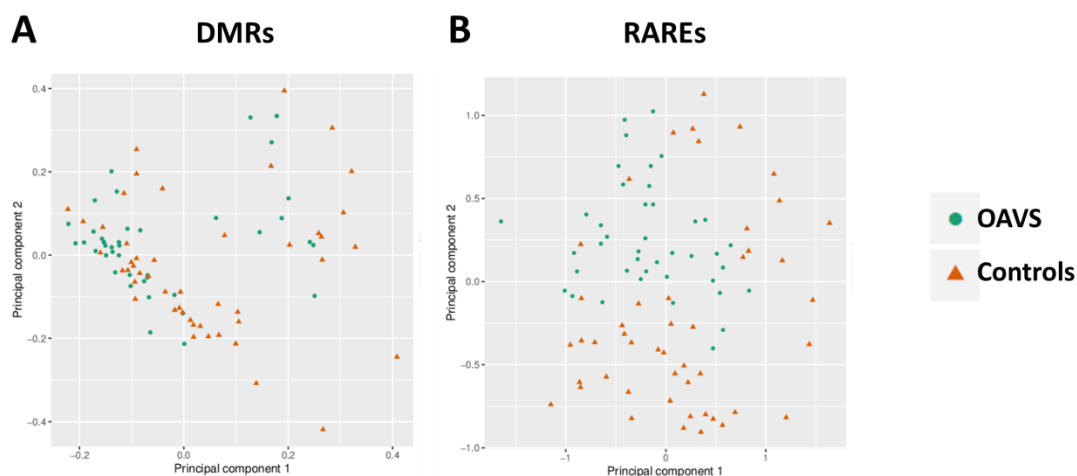

**Figure S1.** RnBeads scatter plot locating samples in the first two principal components at sites encompassing A) imprinted-associated Differentially Methylated Regions (DMR) (variance explained: PC1=27.44%, PC2=23.20%) and B) Retinoic Acid Response Elements (RAREs) ( $\pm 10$ Kb) (variance explained: PC1=24.21%, PC2=15.77%).

23

Supplementary Figure S2

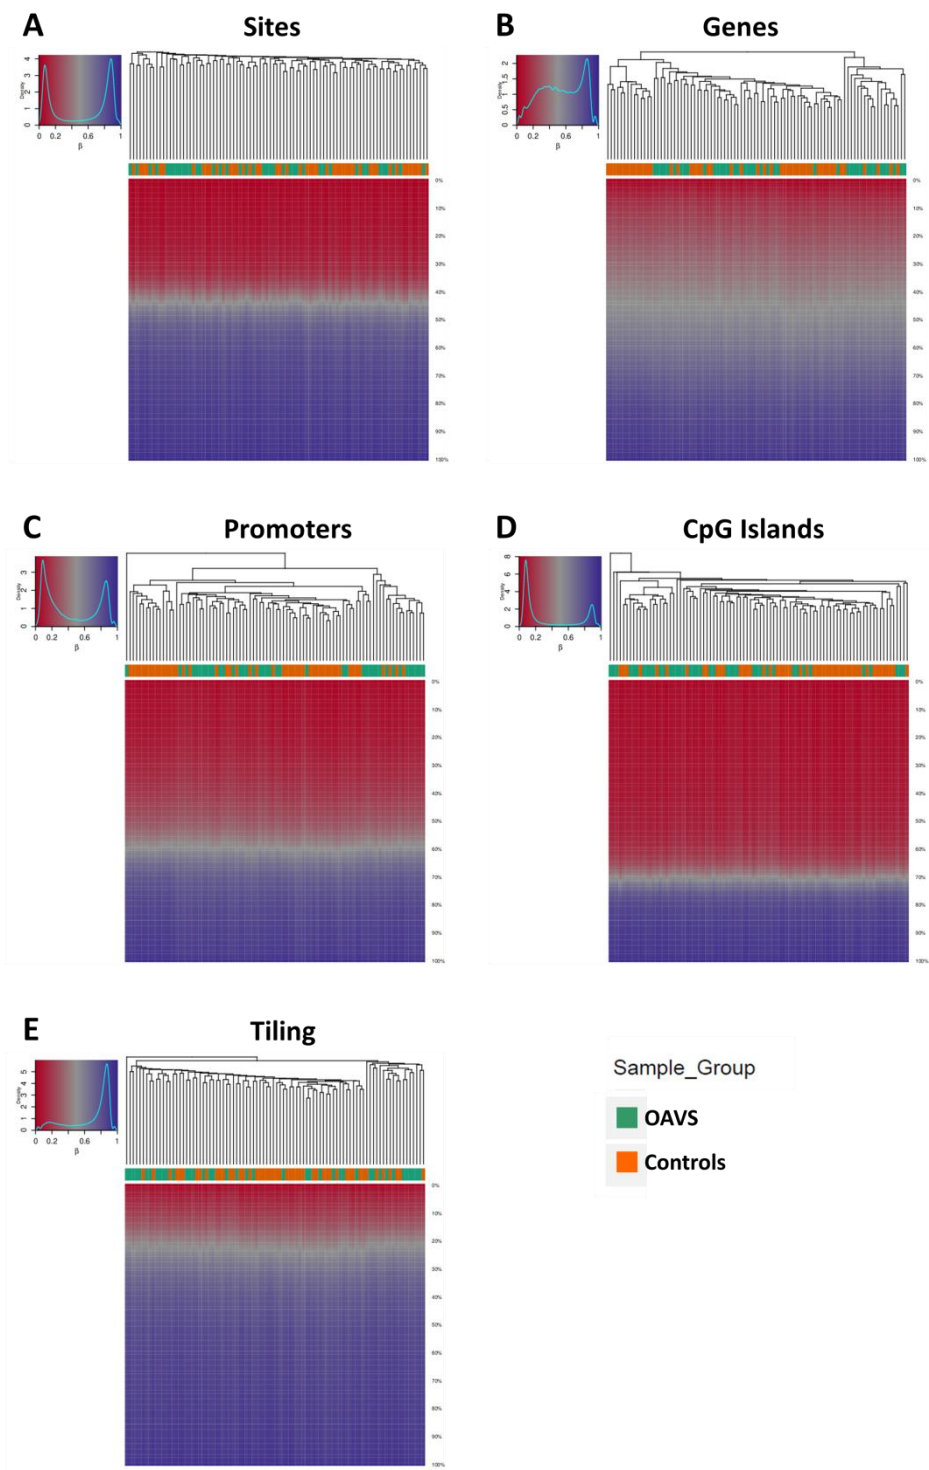

24

25 **Figure S2.** Hierarchical clustering of samples based on 1000 most variable loci. The heatmap displays  
26 methylation percentiles per sample (based on beta-values). (A) sites, (B) genes, (C) promoters, (D)  
27 CpG island, and (E) tiling regions. OAVS samples are depicted as orange bars while controls as  
28 green.

29

30

## Supplementary Figure S3

A)

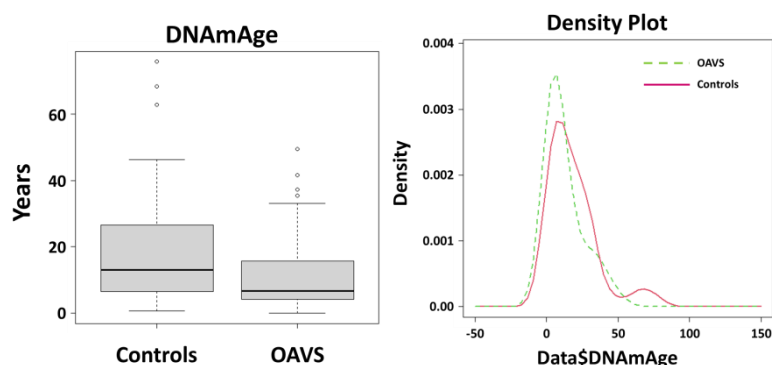

B)

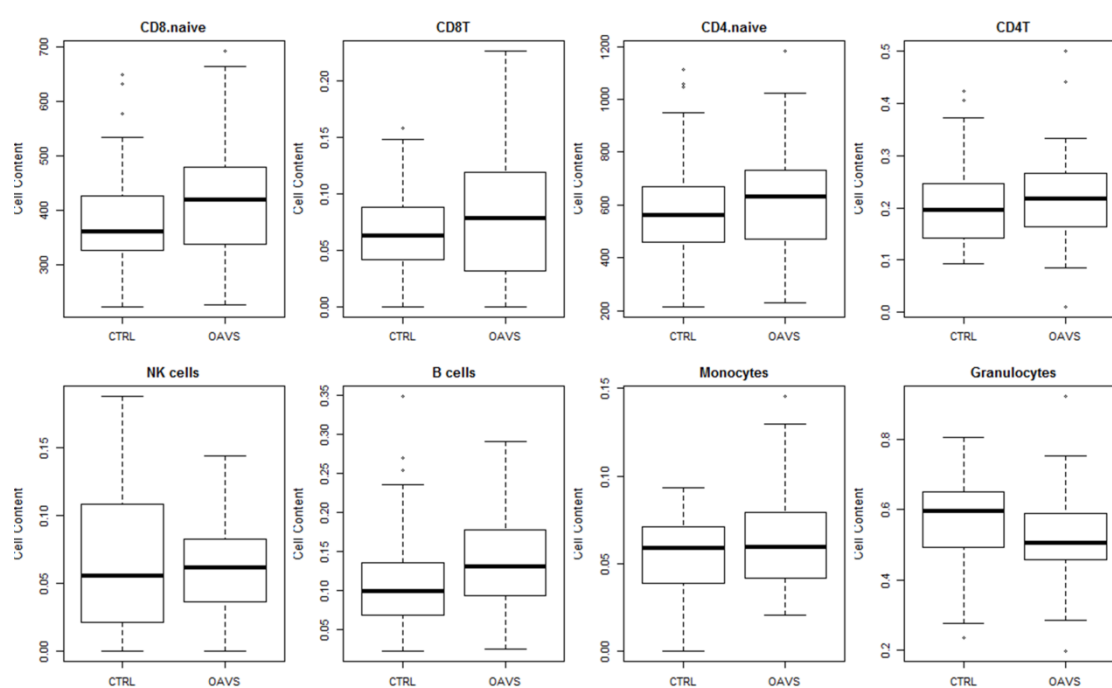

**Figure S3.** A) Boxplot and density plot showing the distribution of estimated values of epigenetic ages in Control and OAVS cohorts. Boxplots and density plots were created by using “Graphics” and “sm” packages, respectively. B) Boxplot of selected cellular components of OAVS patients and controls. For each panel, the thick horizontal line represents the median of the distribution while the box represents the interquartile range. Whiskers are set as the default option for the boxplot function and extend to the most extreme data point which is no more than 1.5 times the interquartile range from the box. Open circles represent single values exceeding 1.5 interquartile ranges.

Supplementary Figure S4

A)

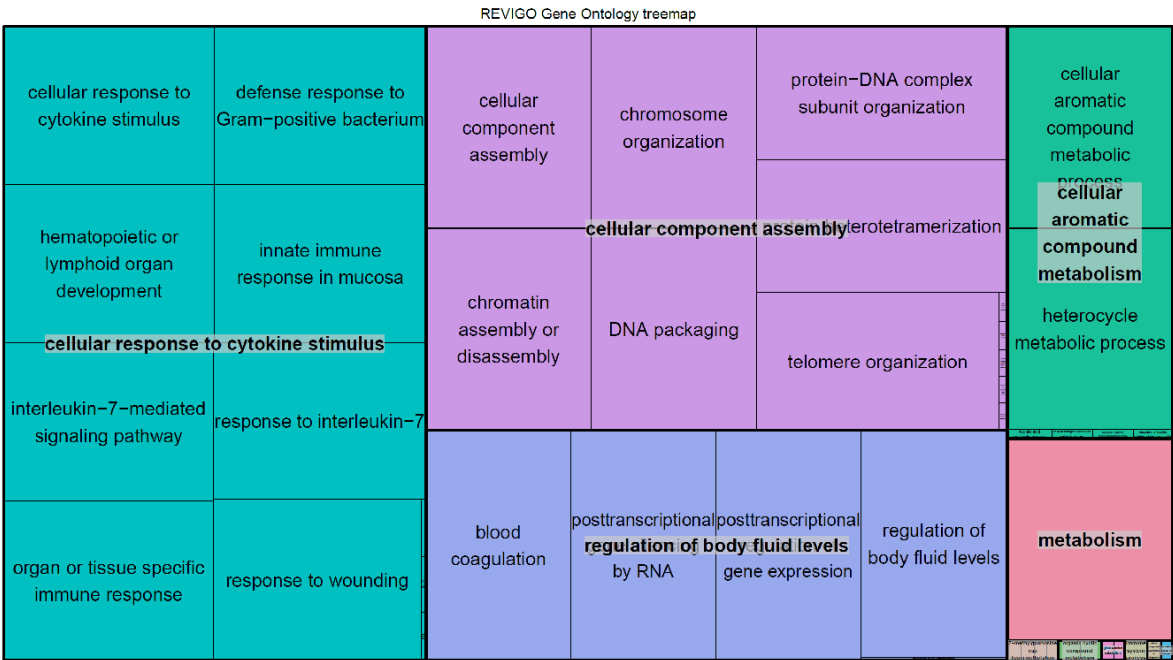

B)

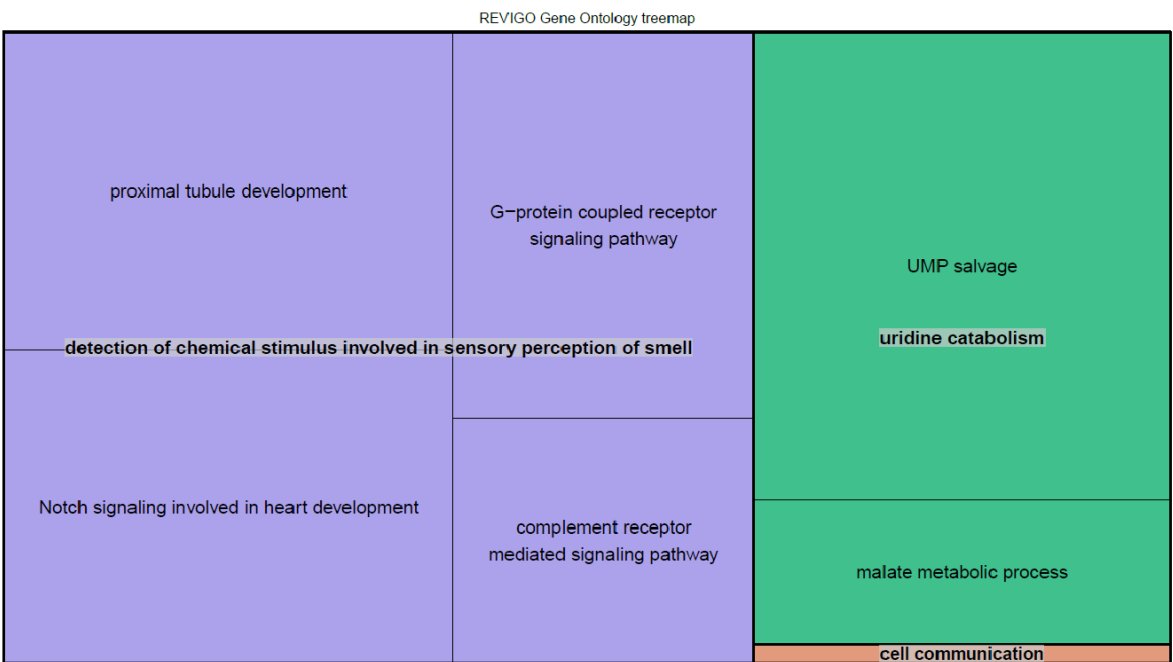

**Figure S4.** REVIGO treemaps of Gene Ontology (GO) biological processes enriched in hyper- (top panel A) and hypomethylated (bottom panel B) gene regions. For each panel, not all enriched terms are reported due to space constraints.

Supplementary Figure S5

Summary   Network   **Barplot**   Details

Barplot

View source data ([http://phenolyzer.wglab.org/done/38799/-tgXxHlvOQYJ7usU/index.htmlout.final\\_gene\\_list](http://phenolyzer.wglab.org/done/38799/-tgXxHlvOQYJ7usU/index.htmlout.final_gene_list))

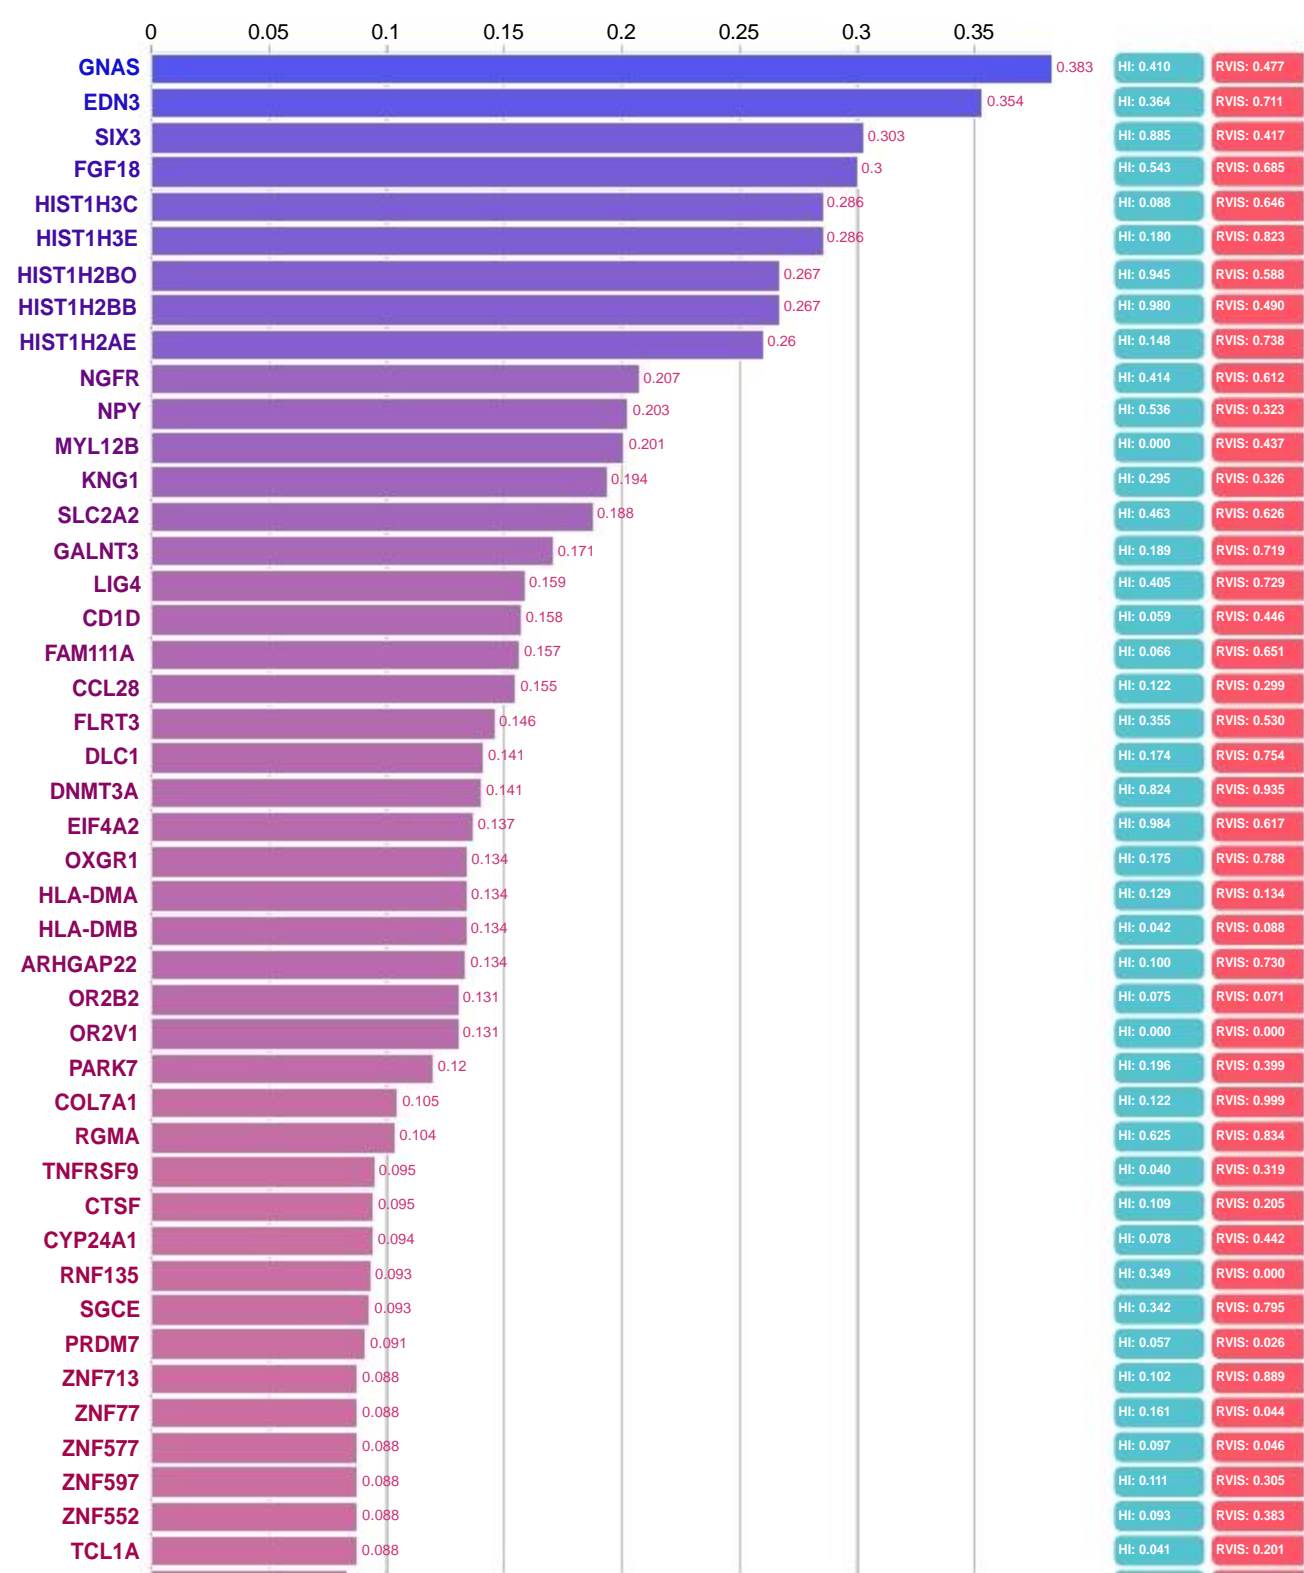

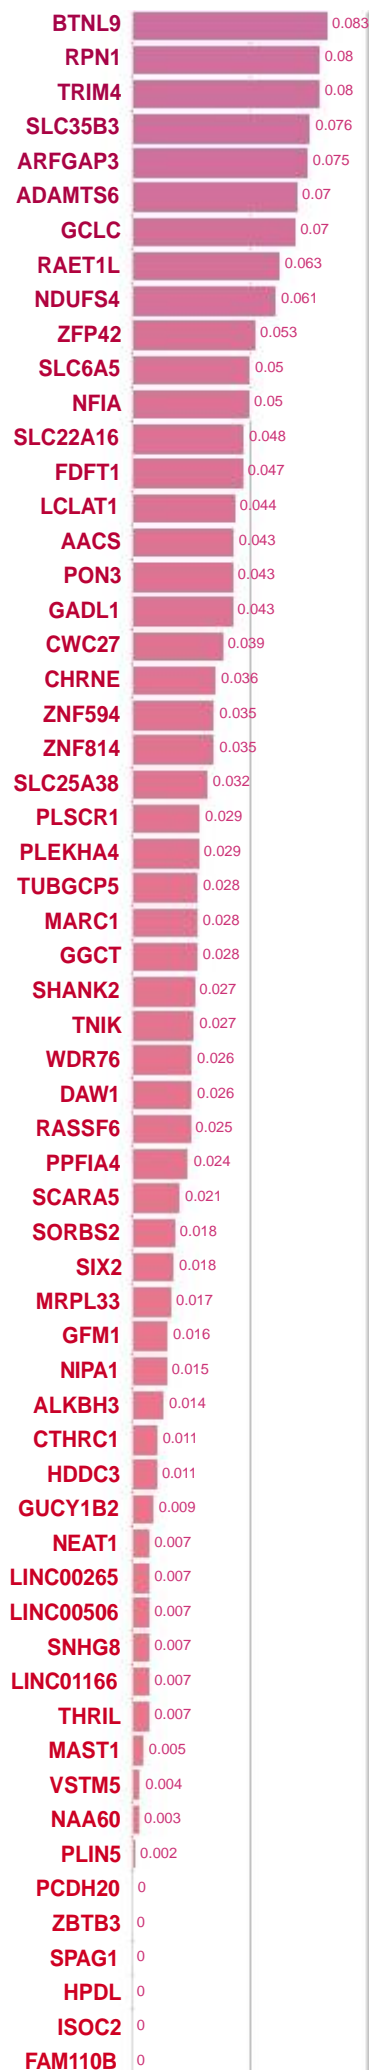

|           |             |
|-----------|-------------|
| HI: 0.109 | RVIS: 0.561 |
| HI: 0.188 | RVIS: 0.479 |
| HI: 0.110 | RVIS: 0.286 |
| HI: 0.150 | RVIS: 0.612 |
| HI: 0.106 | RVIS: 0.083 |
| HI: 0.351 | RVIS: 0.811 |
| HI: 0.598 | RVIS: 0.766 |
| HI: 0.077 | RVIS: 0.009 |
| HI: 0.333 | RVIS: 0.823 |
| HI: 0.194 | RVIS: 0.342 |
| HI: 0.236 | RVIS: 0.127 |
| HI: 0.318 | RVIS: 0.797 |
| HI: 0.101 | RVIS: 0.212 |
| HI: 0.157 | RVIS: 0.935 |
| HI: 0.000 | RVIS: 0.547 |
| HI: 0.159 | RVIS: 0.940 |
| HI: 0.091 | RVIS: 0.160 |
| HI: 0.118 | RVIS: 0.184 |
| HI: 0.000 | RVIS: 0.668 |
| HI: 0.424 | RVIS: 0.900 |
| HI: 0.053 | RVIS: 0.072 |
| HI: 0.000 | RVIS: 0.671 |
| HI: 0.185 | RVIS: 0.463 |
| HI: 0.192 | RVIS: 0.240 |
| HI: 0.073 | RVIS: 0.442 |
| HI: 0.000 | RVIS: 0.868 |
| HI: 0.000 | RVIS: 0.381 |
| HI: 0.000 | RVIS: 0.387 |
| HI: 0.292 | RVIS: 0.000 |
| HI: 0.806 | RVIS: 0.960 |
| HI: 0.650 | RVIS: 0.427 |
| HI: 0.000 | RVIS: 0.000 |
| HI: 0.074 | RVIS: 0.058 |
| HI: 0.145 | RVIS: 0.755 |
| HI: 0.150 | RVIS: 0.166 |
| HI: 0.387 | RVIS: 0.790 |
| HI: 0.887 | RVIS: 0.415 |
| HI: 0.064 | RVIS: 0.471 |
| HI: 0.086 | RVIS: 0.165 |
| HI: 0.346 | RVIS: 0.685 |
| HI: 0.132 | RVIS: 0.237 |
| HI: 0.198 | RVIS: 0.567 |
| HI: 0.111 | RVIS: 0.490 |
| HI: 0.124 | RVIS: 0.000 |
| HI: 0.000 | RVIS: 0.000 |
| HI: 0.437 | RVIS: 0.981 |
| HI: 0.000 | RVIS: 0.061 |
| HI: 0.000 | RVIS: 0.629 |
| HI: 0.000 | RVIS: 0.000 |
| HI: 0.268 | RVIS: 0.907 |
| HI: 0.450 | RVIS: 0.316 |
| HI: 0.051 | RVIS: 0.123 |
| HI: 0.051 | RVIS: 0.517 |
| HI: 0.151 | RVIS: 0.517 |
| HI: 0.136 | RVIS: 0.657 |

Supplementary Figure S6

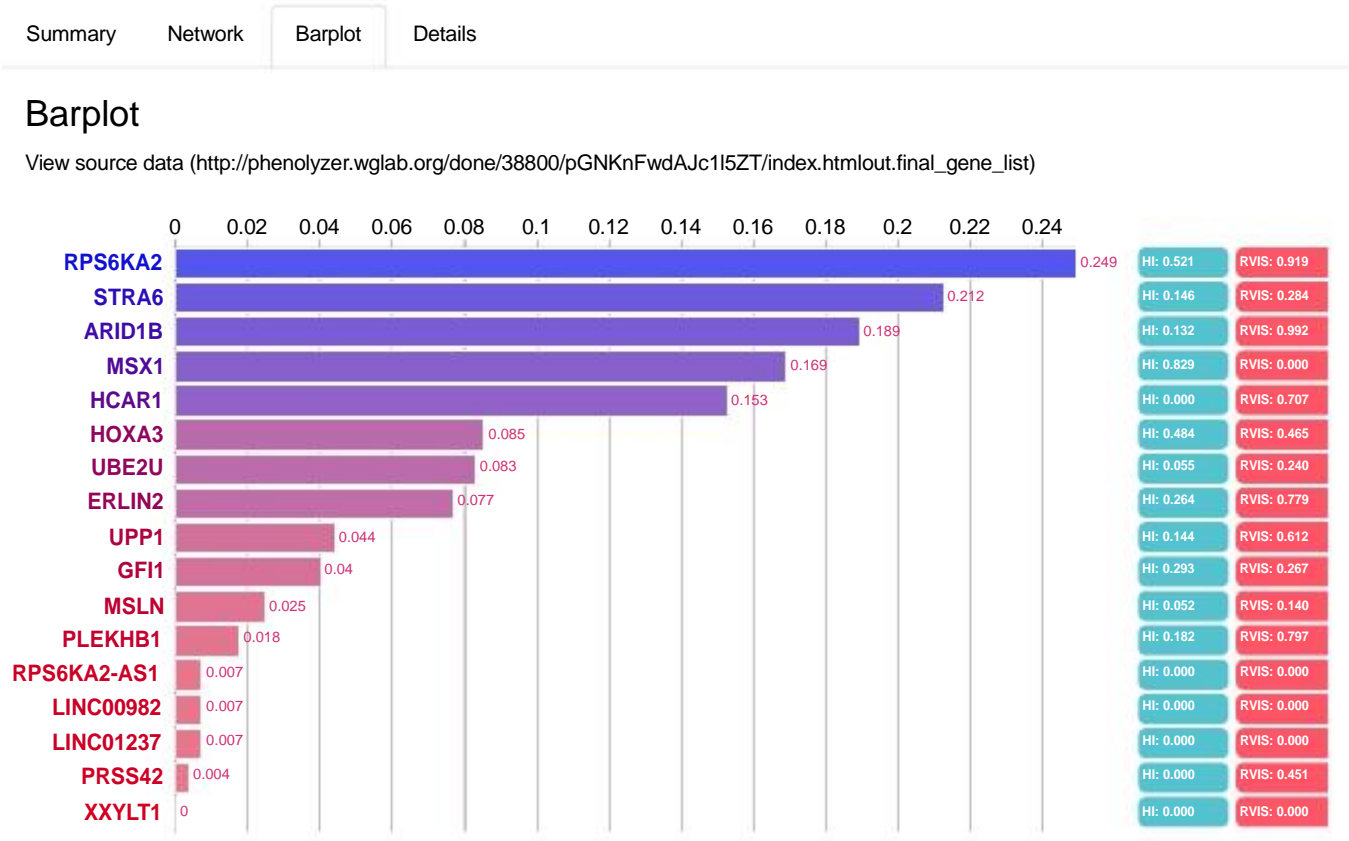

Supplement: s1 [file s1]
