# Supplementary material for: Genome-Wide DNA Methylation Analysis of a Cohort of 41 Patients Affected by Oculo-Auriculo-Vertebral Spectrum (OAVS)
Source: MDPI journal article supplement (doi:10.3390/ijms22031190), 2021-01-26
Supplement: s1 [file s1]

### Supplementary File 1: Table 1

### Detailed clinical information of the 41 OAVS patients.

[illegible]

|    |   |      |    |    |     |   |   |   |   |   |   |   |   |   |   |   |   |   |   |    |    |    |    |    |    |   |    |   |   |   |   |
|----|---|------|----|----|-----|---|---|---|---|---|---|---|---|---|---|---|---|---|---|----|----|----|----|----|----|---|----|---|---|---|---|
| 27 | F | 0.02 | -  | -  | L<R | - | - | + | - | - | + | - | + | - | - | - | + | - | - | -  | ne | ne | ne | ne | ne | + | -  | - | - | - | - |
| 28 | M | 24   | -  | -  | L<R | - | - | + | - | - | + | - | - | - | + | - | + | + | + | -  | ne | ne | ne | ne | ne | - | -  | - | - | - | - |
| 29 | F | 3    | +  | -  | R<L | + | + | + | - | + | + | + | - | - | - | - | - | - | - | -  | -  | -  | -  | -  | -  | - | +  | - | - | - |   |
| 30 | M | na   | -  | -  | ne  | - | - | + | - | - | + | - | - | - | - | - | - | - | - | -  | -  | -  | -  | +  | +  | - | -  | - | - | - |   |
| 32 | F | 6    | -  | -  | L<R | - | - | + | - | - | + | + | - | + | + | - | - | - | - | -  | -  | -  | -  | -  | +  | + | -  | - | - | + |   |
| 33 | M | 7    | +  | +  | R<L | - | - | + | - | - | - | + | - | + | + | - | + | - | - | -  | +  | +  | +  | -  | +  | + | -  | - | + | + | - |
| 34 | M | 20   | -  | -  | R<L | - | - | - | - | - | - | - | + | + | + | - | + | + | + | +  | -  | -  | -  | -  | -  | - | -  | - | - | - | - |
| 35 | M | 4    | -  | -  | R<L | - | - | + | - | - | + | - | - | + | + | - | - | - | - | -  | -  | -  | -  | -  | +  | - | -  | - | - | - | - |
| 36 | F | 1    | -  | ne | R<L | - | - | - | - | - | + | - | - | - | - | - | - | + | - | +  | -  | -  | -  | -  | -  | - | -  | - | - | - | - |
| 37 | M | 46   | -  | ne | L<R | - | - | - | - | - | + | - | + | + | + | - | - | + | - | -  | -  | -  | -  | -  | -  | - | -  | - | - | - | - |
| 39 | M | 6    | -  | ne | R<L | - | - | + | - | - | - | - | - | - | + | + | - | + | - | -  | -  | -  | -  | +  | -  | - | +  | + | - | - | - |
| 40 | F | 7    | -  | +  | R<L | - | - | + | - | - | + | - | - | - | + | - | - | - | + | ne | ne | ne | ne | ne | -  | - | -  | - | - | - | - |
| 41 | F | 14   | -  | -  | R<L | - | - | + | - | - | + | - | - | + | + | - | - | + | - | +  | -  | -  | -  | +  | +  | + | +  | - | - | - | + |
| 42 | F | 0.58 | -  | -  | R<L | + | - | + | - | - | + | - | - | - | - | - | + | + | - | +  | -  | -  | -  | -  | -  | + | ne | - | - | - | + |
| 43 | F | 0.42 | -  | -  | ne  | - | - | + | - | - | + | - | - | - | - | - | - | - | + | -  | -  | -  | -  | -  | -  | - | -  | - | - | - | - |
| 44 | M | 9    | -  | +  | L<R | - | - | + | - | - | + | + | + | + | + | + | - | - | - | -  | -  | -  | -  | -  | -  | - | -  | - | - | - | - |
| 45 | F | 1    | -  | ne | R<L | + | + | + | - | - | - | - | + | - | + | - | - | - | - | -  | -  | -  | -  | -  | +  | - | -  | - | - | - | + |
| 46 | M | na   | ne | ne | +   | - | - | - | - | - | - | - | - | - | + | - | - | - | - | -  | -  | -  | -  | -  | -  | - | +  | - | - | - | - |
| 47 | M | 13   | -  | ne | R<L | + | - | + | - | - | - | - | - | + | + | - | - | - | - | -  | +  | -  | -  | +  | -  | - | -  | + | - | - | - |

Table legend: **na**=not available; **ne**=not evaluated; **L**=left; **R**=right
